# Supplementary material for: Abemaciclib as initial therapy for advanced breast cancer: MONARCH 3 updated results in prognostic subgroups
Source: PubMed Central journal article supplement (PMC8219718; doi:10.1038/s41523-021-00289-7), 2021-06-22
Supplement: 41523_2021_289_MOESM1_ESM.pdf [file 41523_2021_289_MOESM1_ESM.pdf]

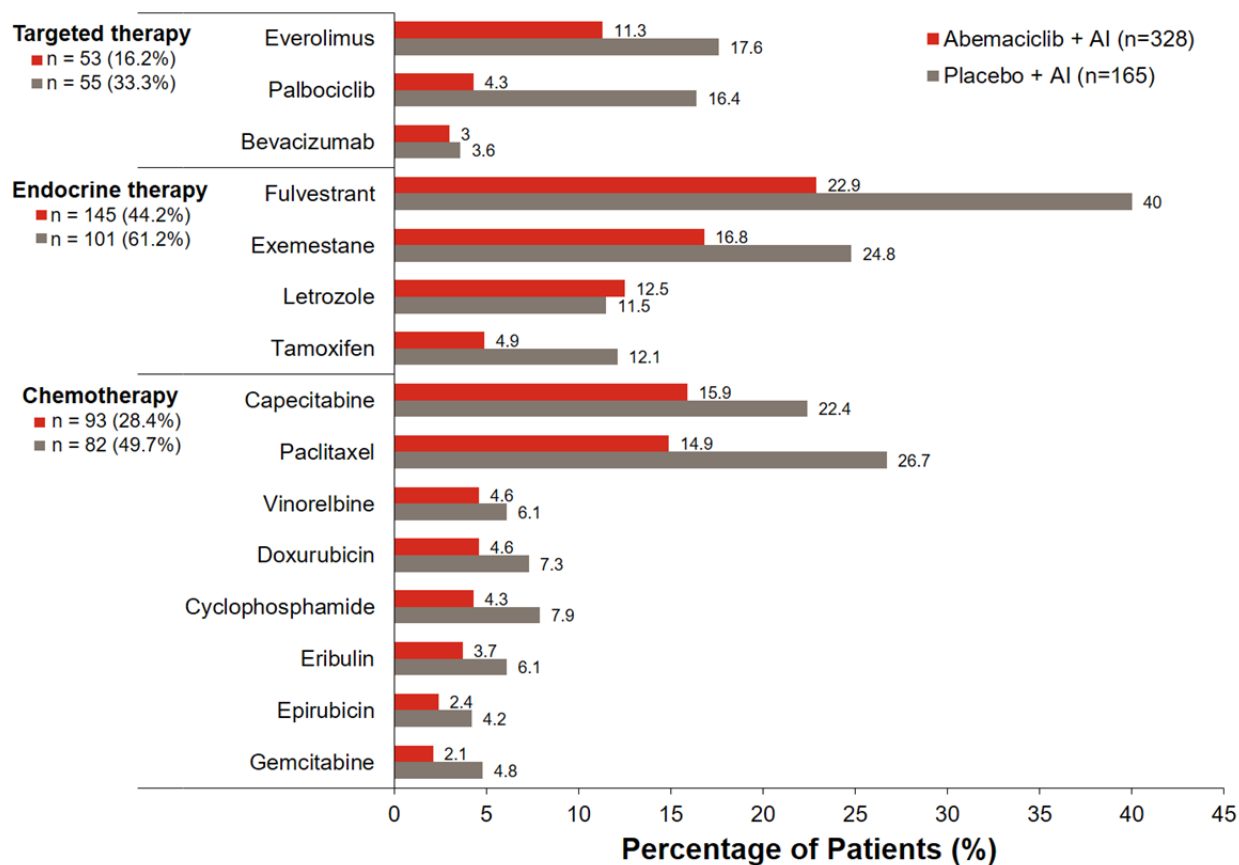

**Supplementary Figure 1.** Most common overall systemic therapies  $\geq 3\%$  of patients<sup>1</sup> (ITT population)

<sup>1</sup>All lines of post-discontinuation systemic therapy are included. Patients can be included in more than one category.

Abbreviations: AI, aromatase inhibitor; n, number of patients; ITT, intent-to-treat.
